# Supplementary material
Source: MDPI journal article supplement (https://www.mdpi.com/2071-1050/16/6/2475)
Supplement: s1 [file s1 › sustainability-2865406-supplementary.pdf]

# Supplementary

**Table S1.** Data sets used in this study.

| Dataset                                      | Type                              | Unit                             | Spatial resolution | Temporal resolution | Source                |
|----------------------------------------------|-----------------------------------|----------------------------------|--------------------|---------------------|-----------------------|
| Surface PM <sub>2.5</sub>                    | Surface                           | $\mu\text{g m}^{-3}$             | 1km×1km            | Daily               | Bai et al. (2022)     |
| Surface ozone                                | Surface                           | $\mu\text{g m}^{-3}$             | 0.1°×0.1°          | Daily               | Ma et al.(2023)       |
| Surface SO <sub>2</sub>                      | Surface                           | $\mu\text{g m}^{-3}$             | 0.1°×0.1°          | Daily               | Ma et al.(2023)       |
| Surface NO <sub>2</sub>                      | Surface                           | $\mu\text{g m}^{-3}$             | 0.1°×0.1°          | Daily               | Ma et al.(2023)       |
| HCHO                                         | total column formaldehyde         | $\text{kg m}^{-2}$               | 0.75°×0.75°        | 3-hour              | CAMS                  |
| hydrogen peroxide                            | total column peroxyacetyl nitrate | $\text{kg m}^{-2}$               | 0.75°×0.75°        | 3-hour              | CAMS                  |
| isoprene                                     | total column isoprene             | $\text{kg m}^{-2}$               | 0.75°×0.75°        | 3-hour              | CAMS                  |
| Peroxyacetyl nitrate                         | total column peroxyacetyl nitrate | $\text{kg m}^{-2}$               | 0.75°×0.75°        | 3-hour              | CAMS                  |
| hydroxyl radicals                            | total column hydroxyl radicals    | $\text{kg m}^{-2}$               | 0.75°×0.75°        | 3-hour              | CAMS                  |
| methane                                      | total column methane              | $\text{kg m}^{-2}$               | 0.75°×0.75°        | 3-hour              | CAMS                  |
| propane                                      | total column propane              | $\text{kg m}^{-2}$               | 0.75°×0.75°        | 3-hour              | CAMS                  |
| CAMS NO <sub>x</sub> anthropogenic emissions | /                                 | $\text{kg m}^{-2} \text{s}^{-1}$ | 0.1°×0.1°          | Monthly             | CAMS                  |
| CAMS SO <sub>x</sub> anthropogenic emissions | /                                 | $\text{kg m}^{-2} \text{s}^{-1}$ | 0.1°×0.1°          | Monthly             | CAMS                  |
| Surface temperature                          | Surface 2m                        | K                                | 0.1°×0.1°          | 1-hour              | ERA5                  |
| Surface UV radiation                         | Integrated                        | $\text{J m}^{-2}$                | 0.1°×0.1°          | 1-hour              | ERA5                  |
| Relative humidity                            | 1000 hpa                          | %                                | 0.1°×0.1°          | 1-hour              | ERA5                  |
| Surface pressure                             | Surface                           | Pa                               | 0.1°×0.1°          | 1-hour              | ERA5                  |
| Boundary layer height                        | Integrated                        | m                                | 0.1°×0.1°          | 1-hour              | ERA5                  |
| Wind speed                                   | Surface 10m                       | $\text{m s}^{-1}$                | 0.1°×0.1°          | 1-hour              | ERA5                  |
| Wind direction                               | Surface 10m                       | °                                | 0.1°×0.1°          | 1-hour              | ERA5                  |
| Total cloud cover                            | Integrated                        | %                                | 0.1°×0.1°          | 1-hour              | ERA5                  |
| Land cover                                   | Surface                           | /                                | 1km×1km            | Yearly              | Yang and Huang (2021) |
| Population                                   | /                                 | /                                | 1km×1km            | Yearly              | CRESDC                |
| NDVI                                         | Surface                           | /                                | 0.05°×0.05°        | 16-day              | MODIS                 |
| AOD                                          | /                                 | /                                | 1km×1km            | Daily               | Bai et al. (2022)     |
| Aerosol component                            | Integrated                        | $\text{kg m}^{-3}$               | 0.5°×0.625°        | 1-hour              | MERRA-2               |

**Figures: S1–S21**

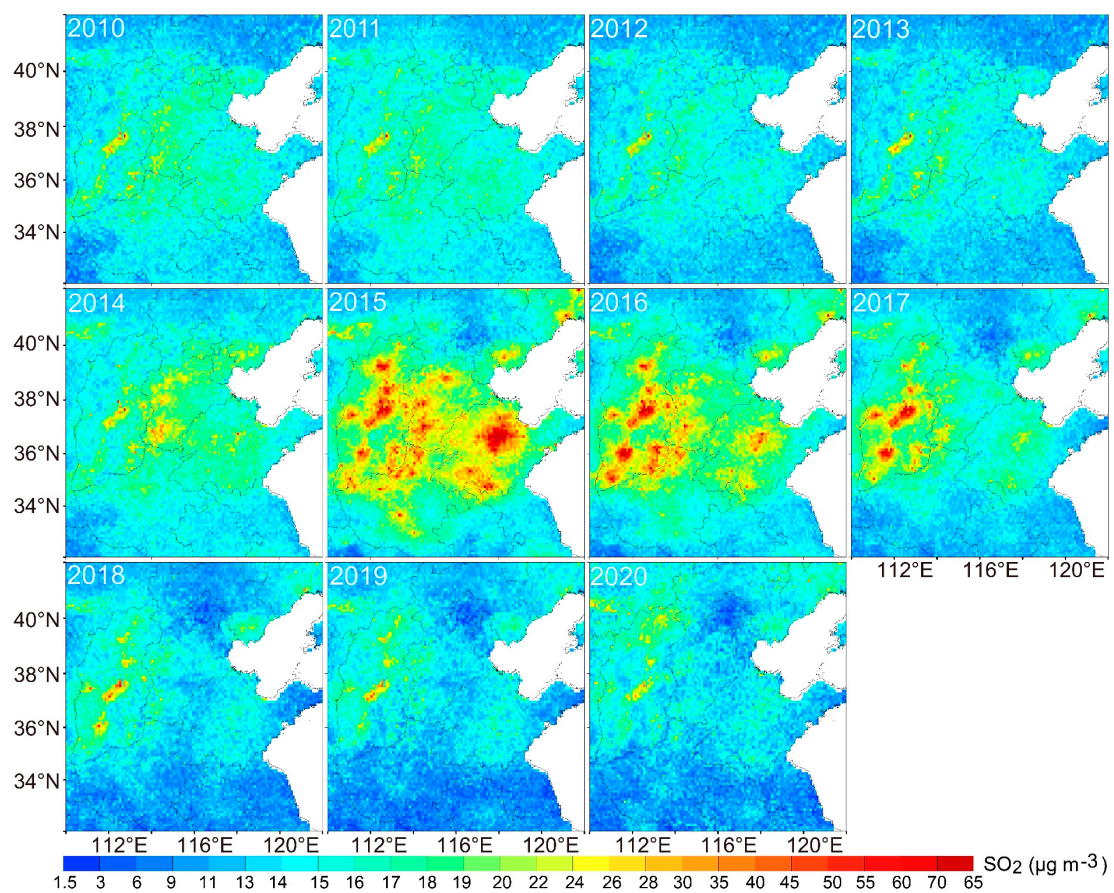

**Figure S1.** The spatial distribution of annual SO<sub>2</sub> concentration in the NCP during 2010–2020.

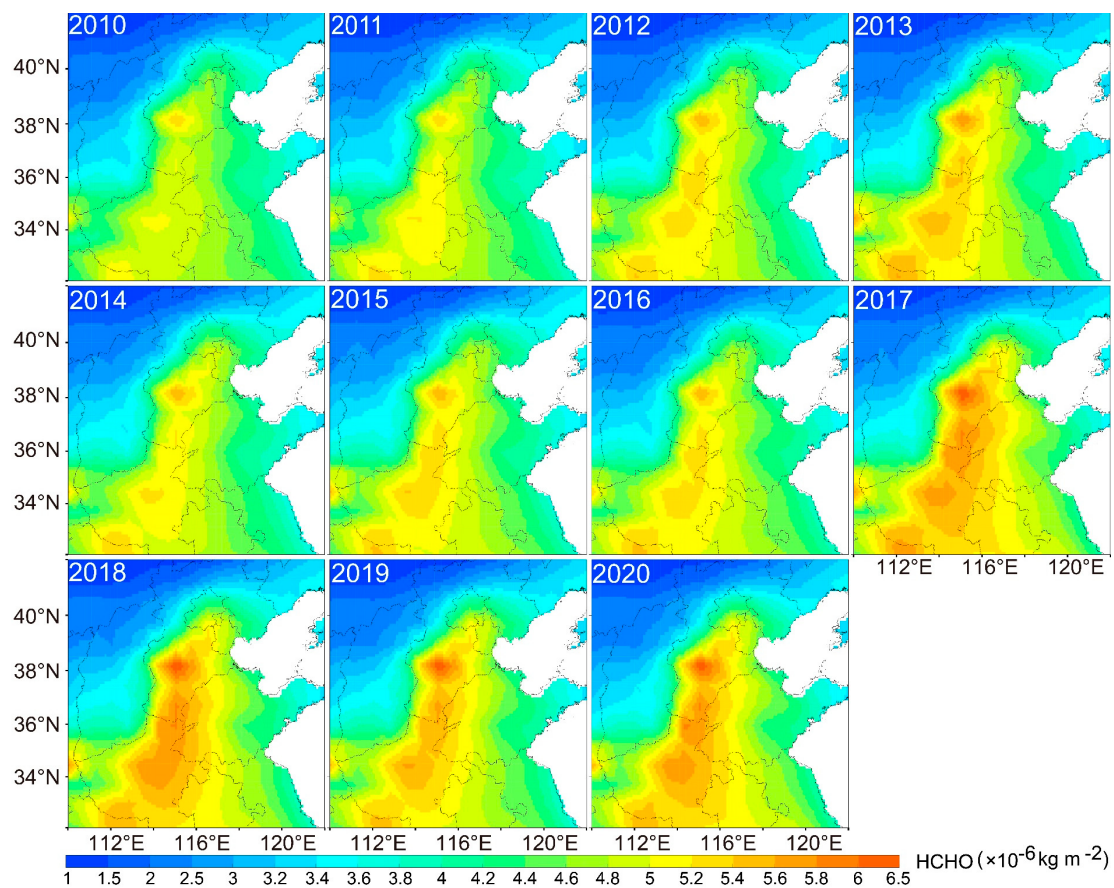

**Figure S2.** The spatial distribution of annual HCHO concentration in the NCP during 2010-2020.

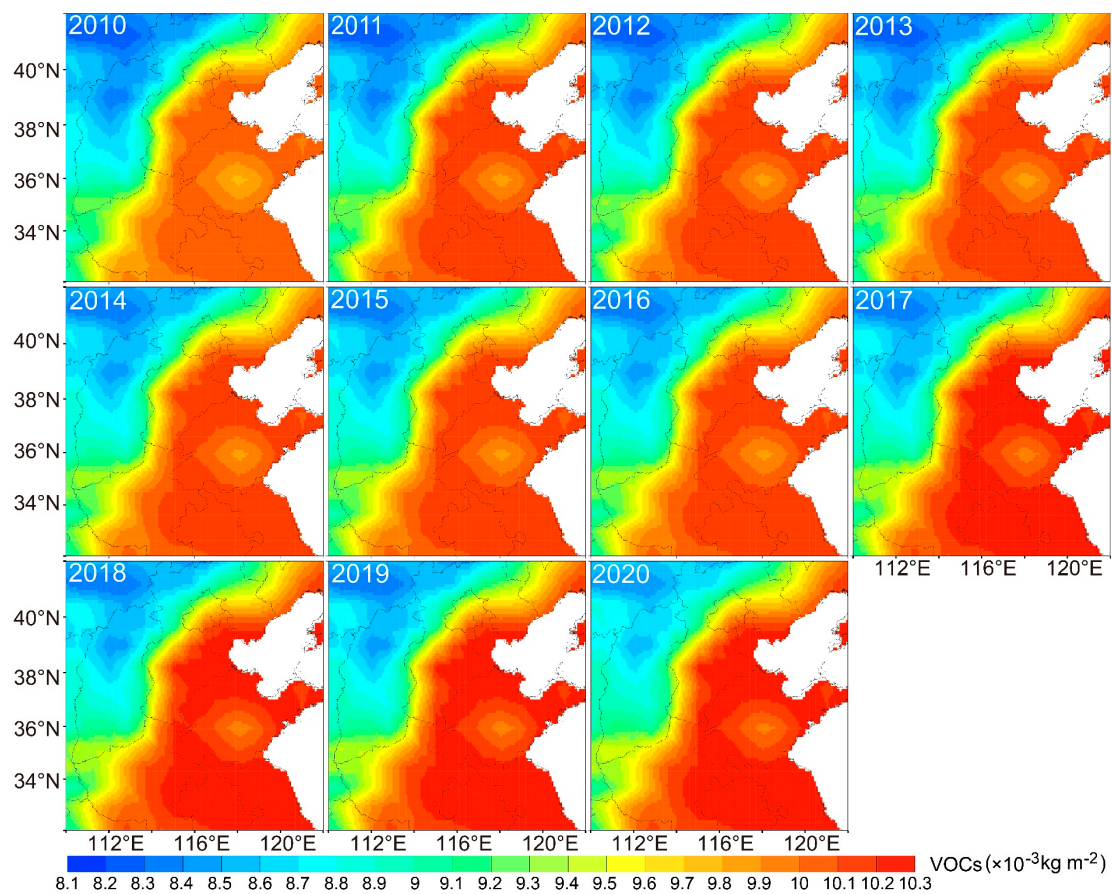

**Figure S3.** The spatial distribution of annual VOCs concentration in the NCP during 2010-2020.

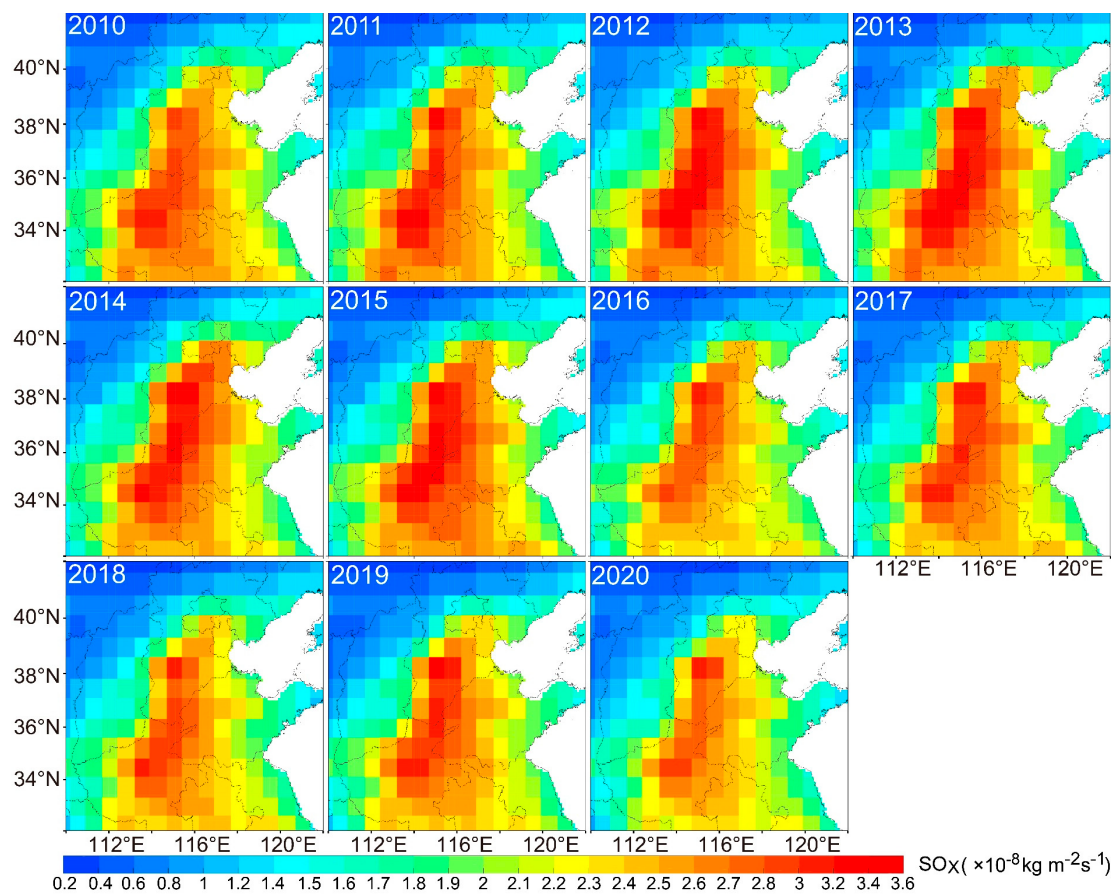

**Figure S4.** The spatial distribution of annual  $\text{SO}_x$  concentration in the NCP during 2010-2020.

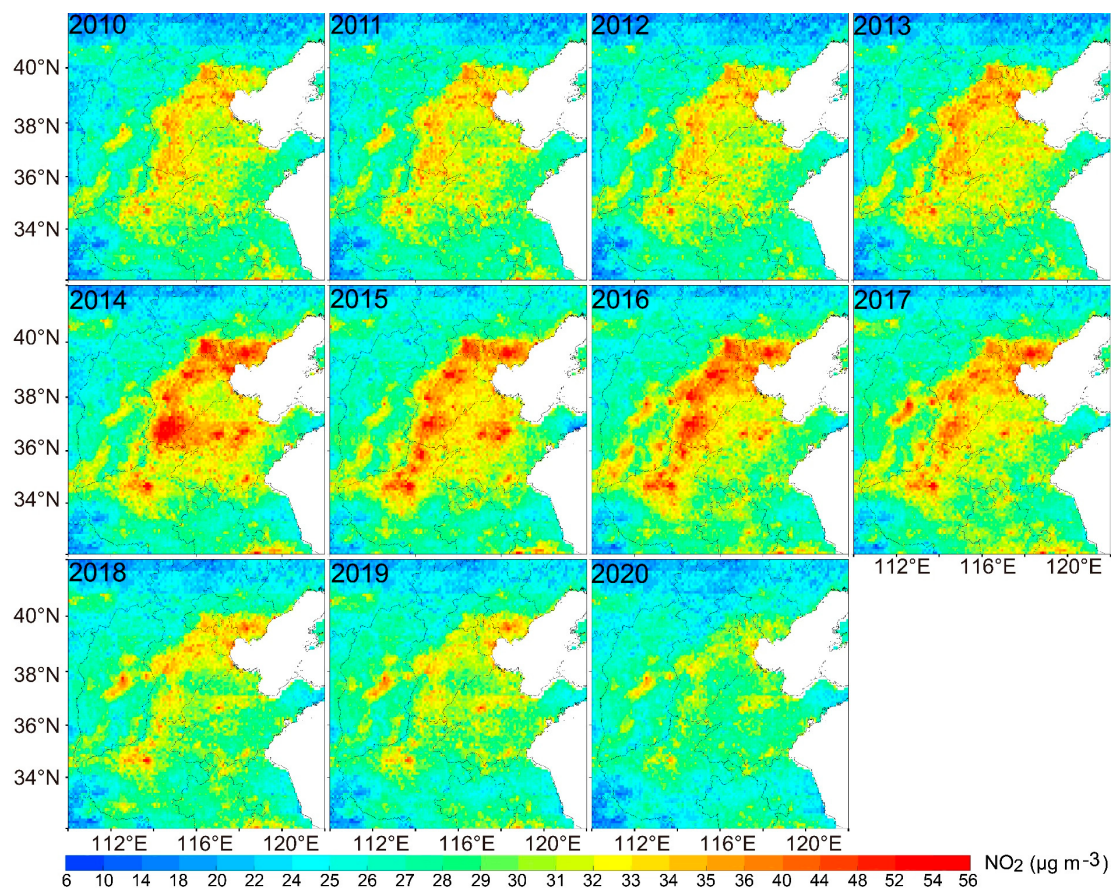

**Figure S5.** The spatial distribution of annual  $\text{NO}_2$  concentration in the NCP during 2010-2020.

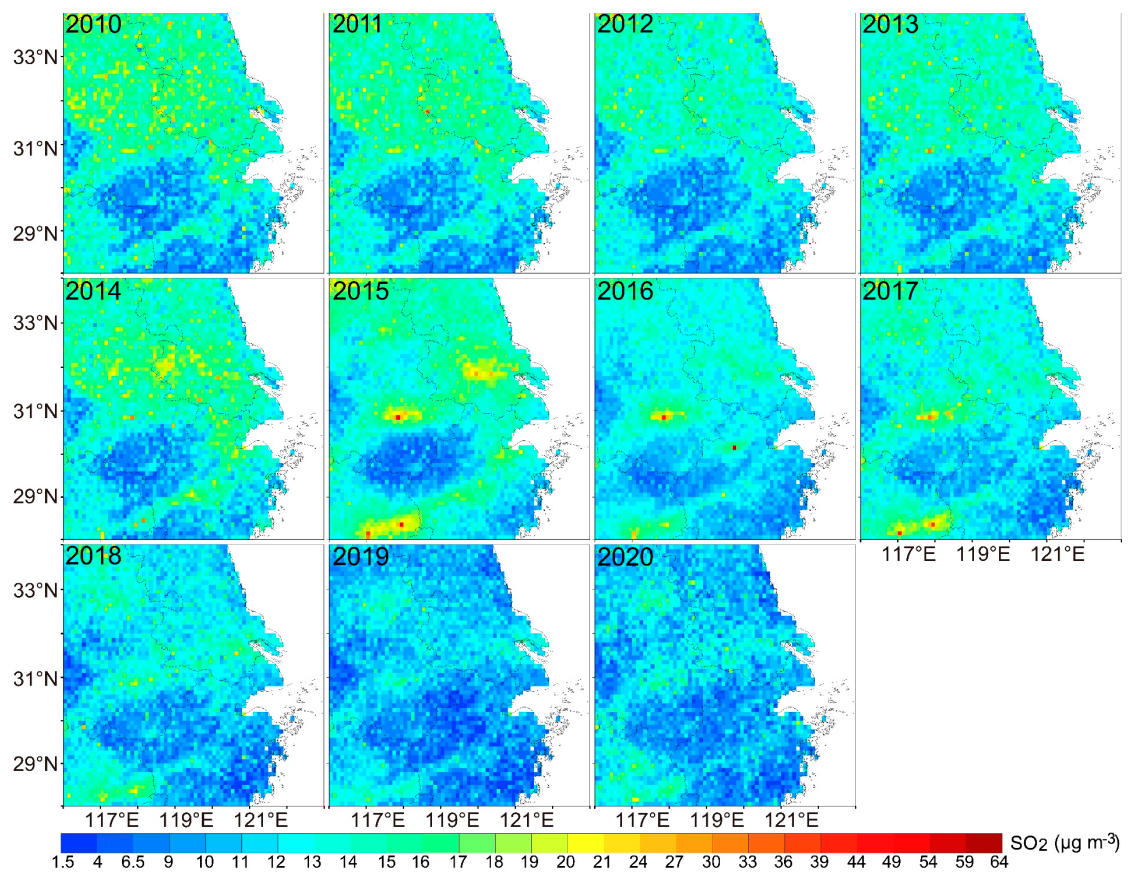

**Figure S6.** The spatial distribution of annual  $\text{SO}_2$  concentration in the YRD during 2010-2020.

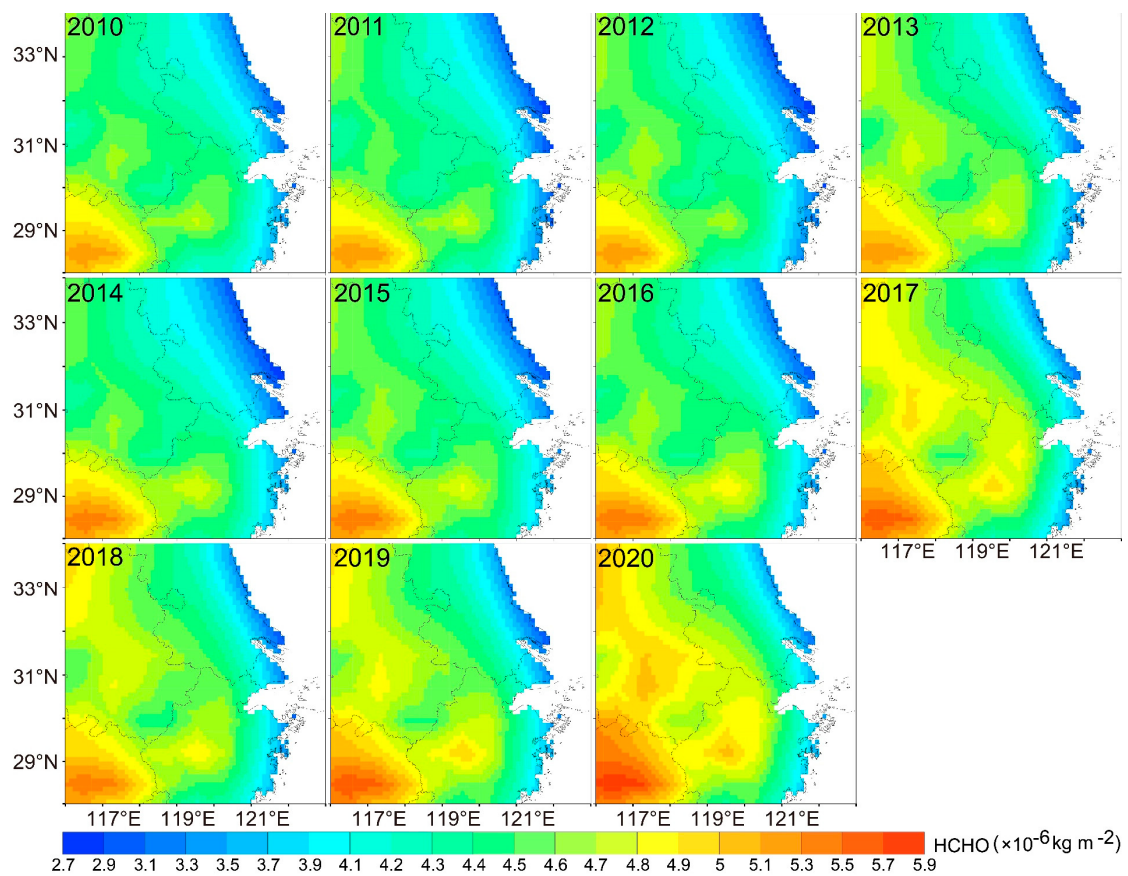

**Figure S7.** The spatial distribution of annual HCHO concentration in the YRD during 2010-2020.

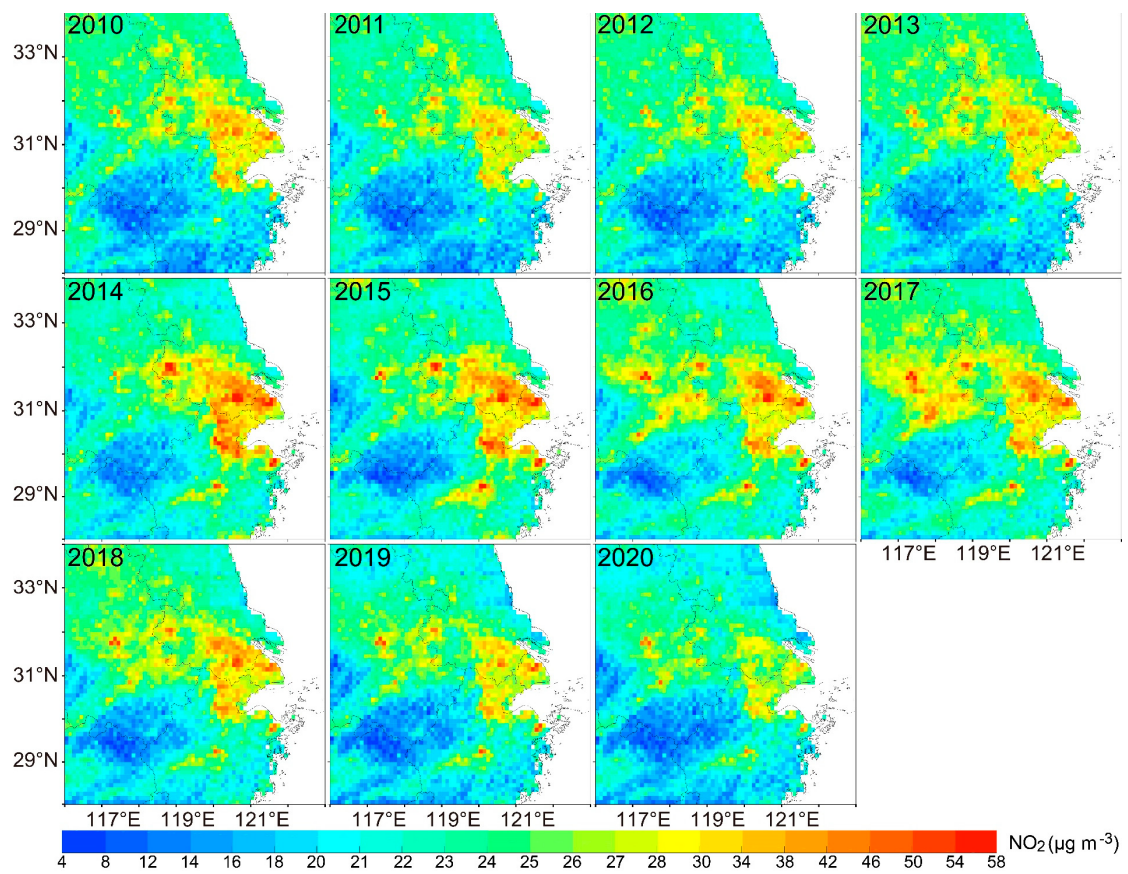

**Figure S8.** The spatial distribution of annual  $\text{NO}_2$  concentration in the YRD during 2010-2020.

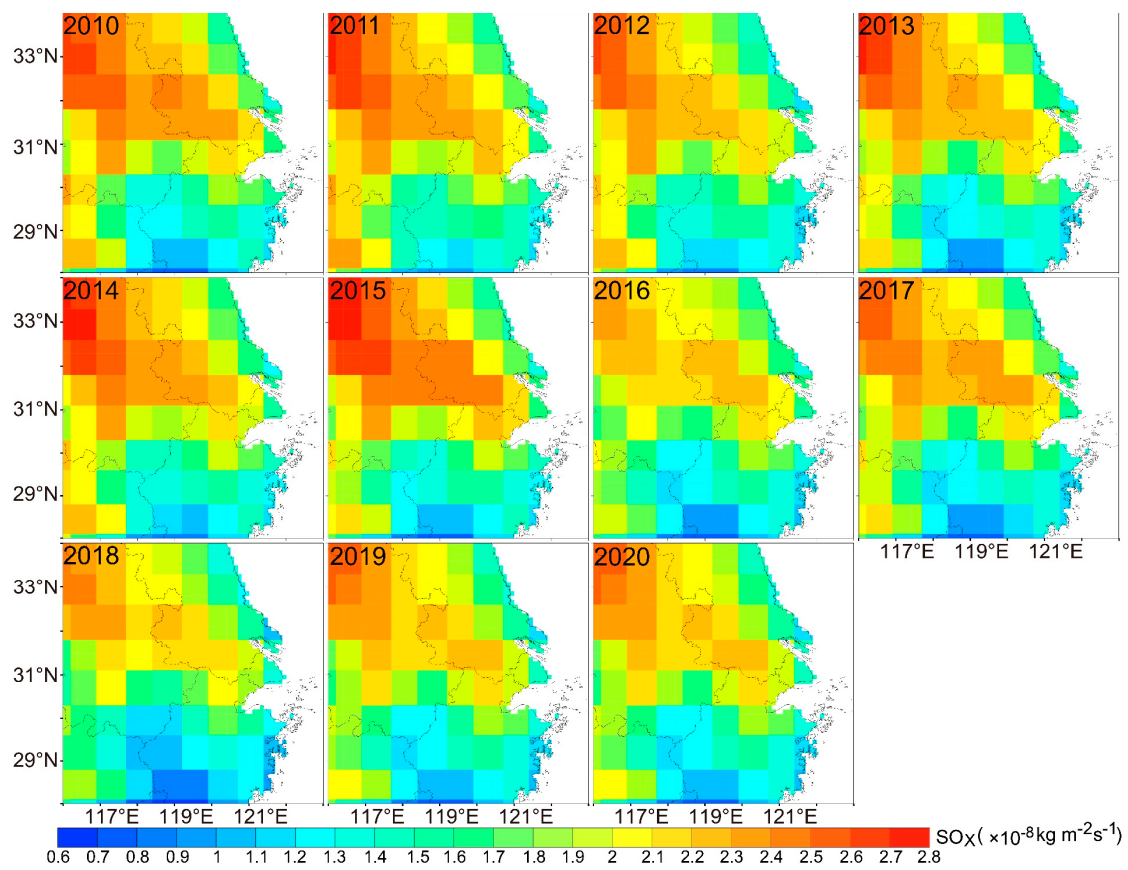

**Figure S9.** The spatial distribution of annual  $\text{SO}_x$  concentration in the YRD during 2010-2020.

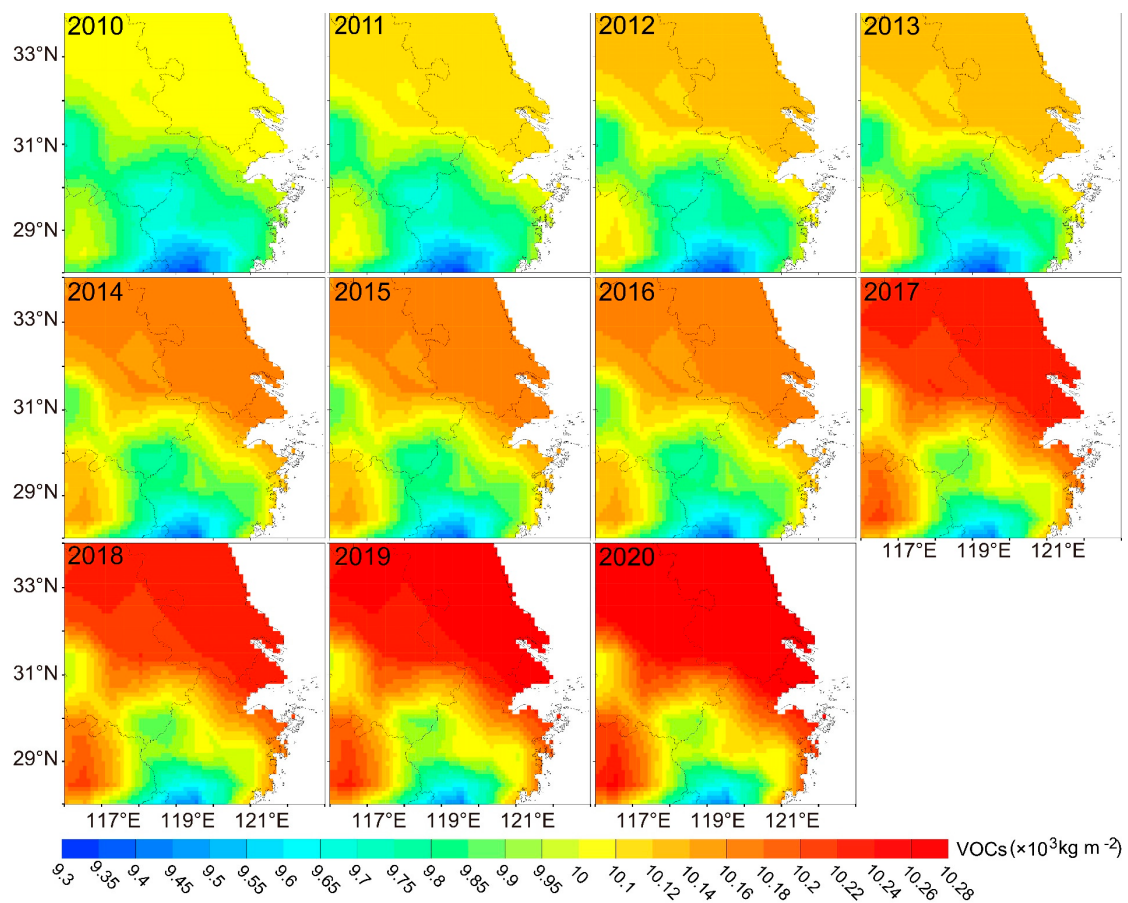

**Figure S10.** The spatial distribution of annual VOCs concentration in the YRD during 2010-2020.

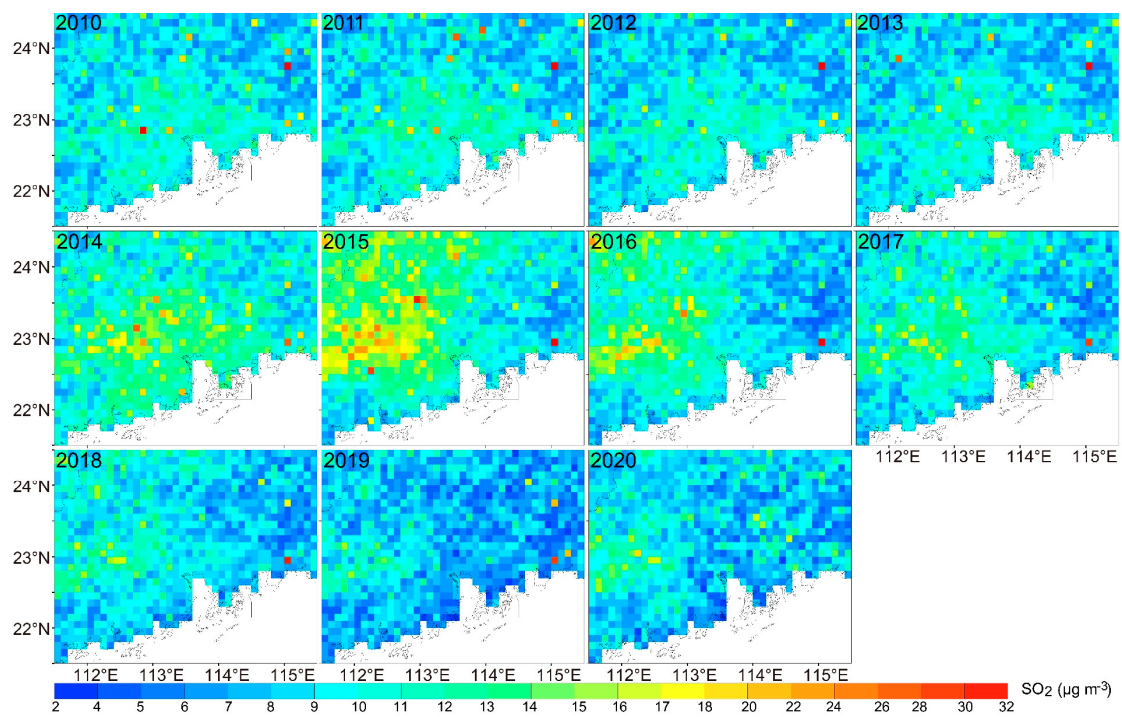

**Figure S11.** The spatial distribution of annual  $\text{SO}_2$  concentration in the PRD during 2010-2020.

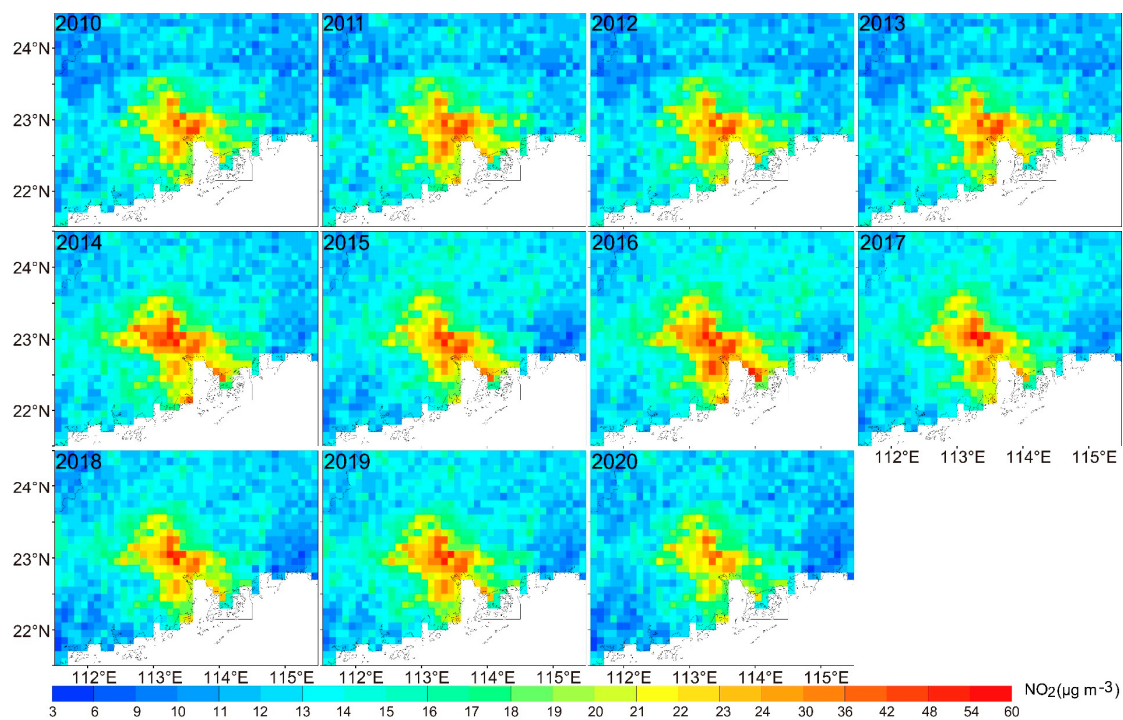

**Figure S12.** The spatial distribution of annual  $\text{NO}_2$  concentration in the PRD during 2010-2020.

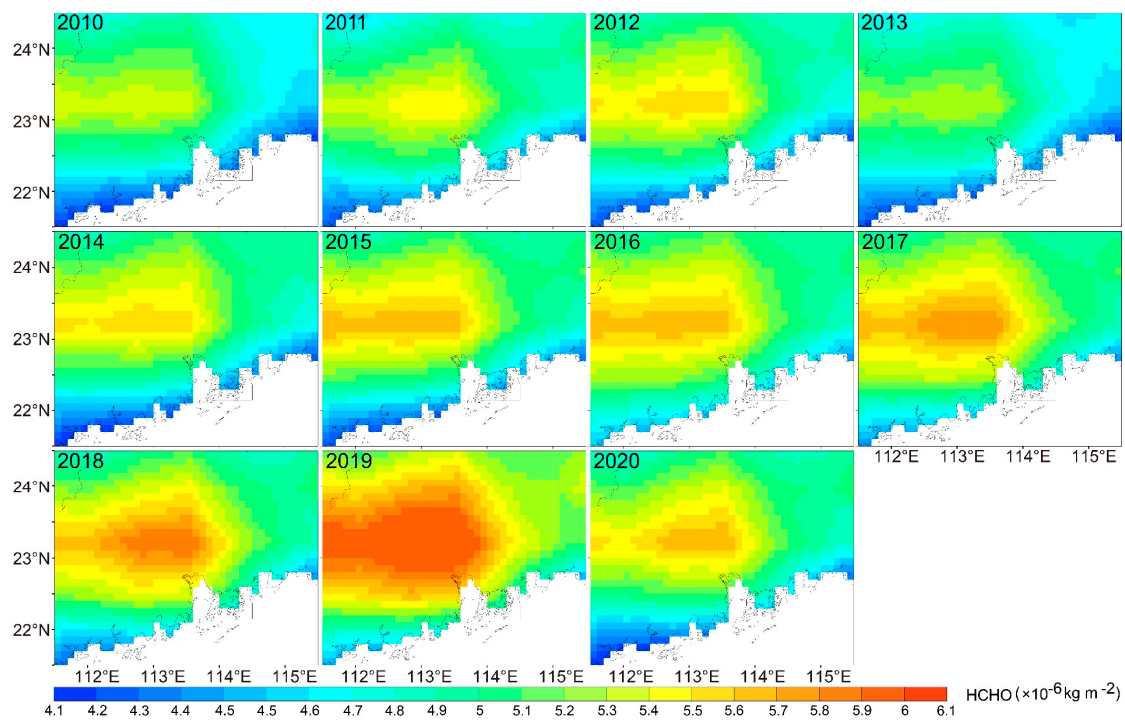

**Figure S13.** The spatial distribution of annual HCHO concentration in the PRD during 2010-2020.

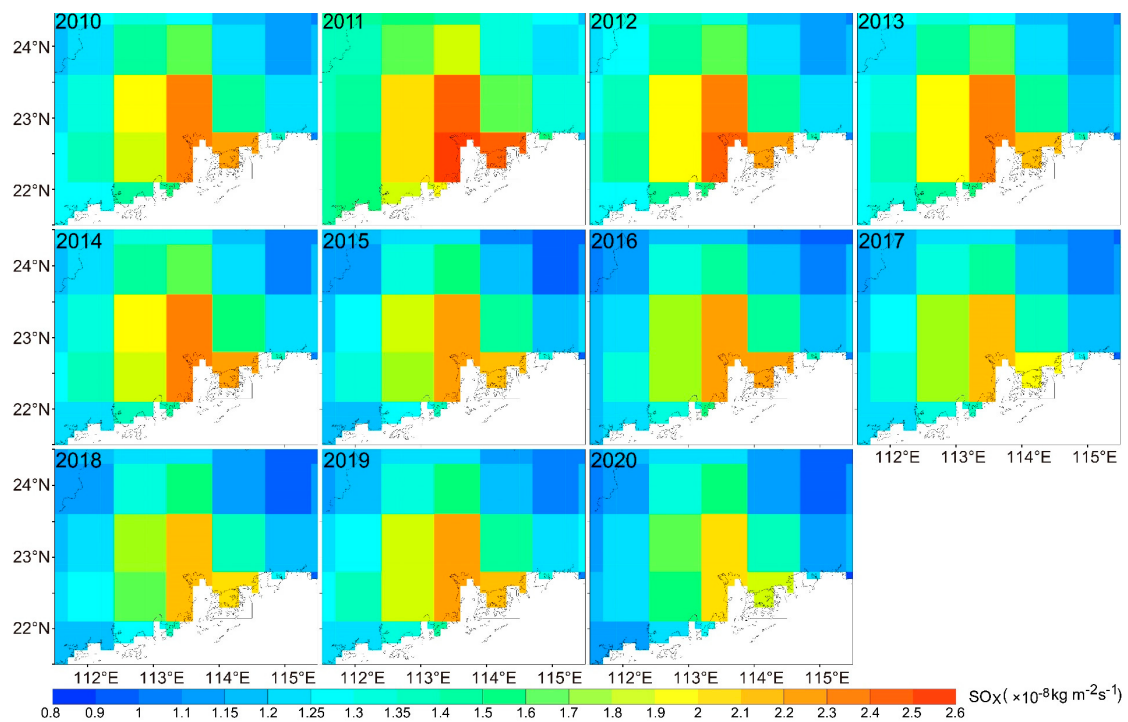

**Figure S14.** The spatial distribution of annual  $\text{SO}_x$  concentration in the PRD during 2010-2020.

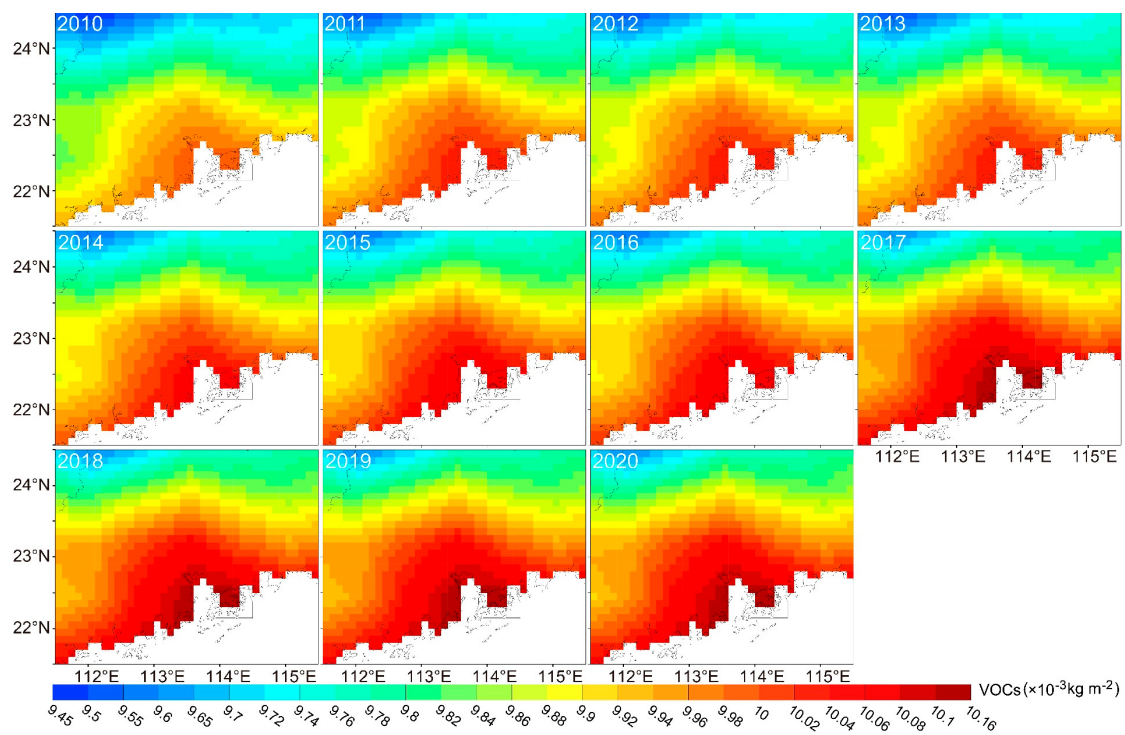

**Figure S15.** The spatial distribution of annual VOCs concentration in the PRD during 2010-2020.

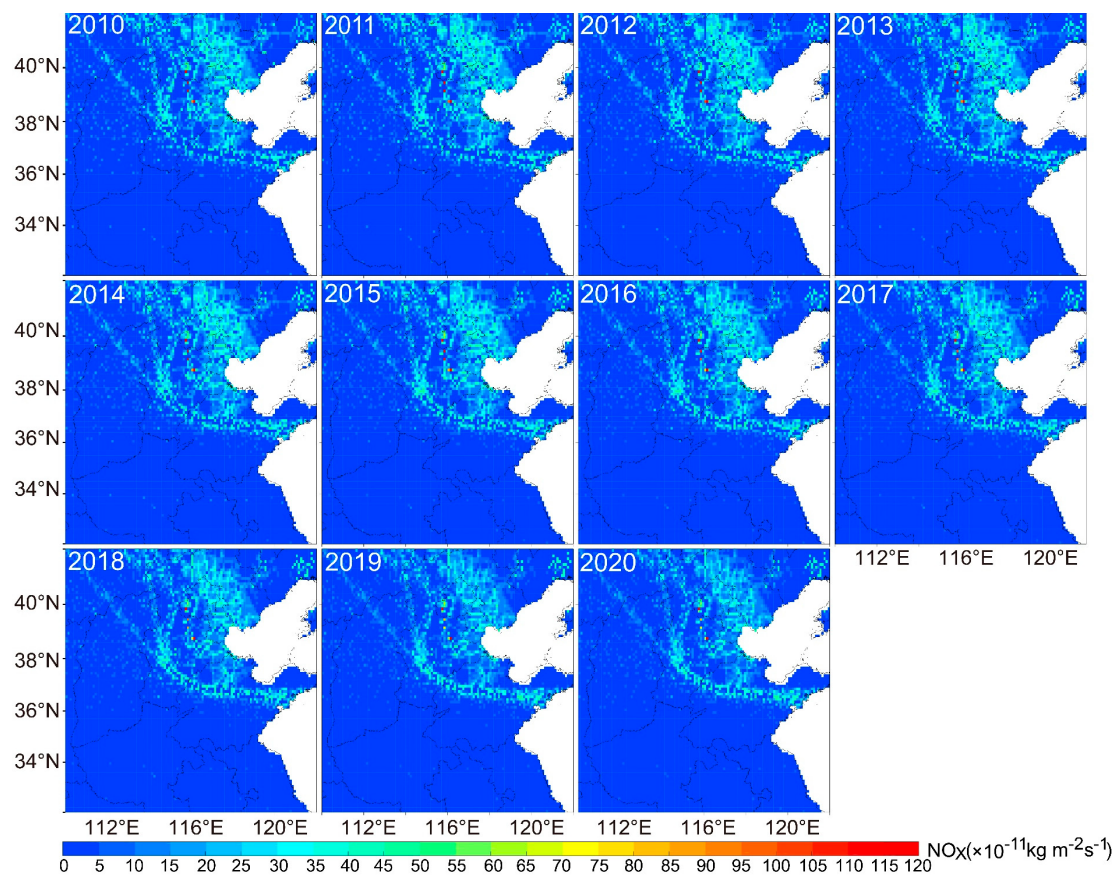

**Figure S16.** The spatial distribution of annual  $\text{NO}_x$  concentration in the NCP during 2010-2020.

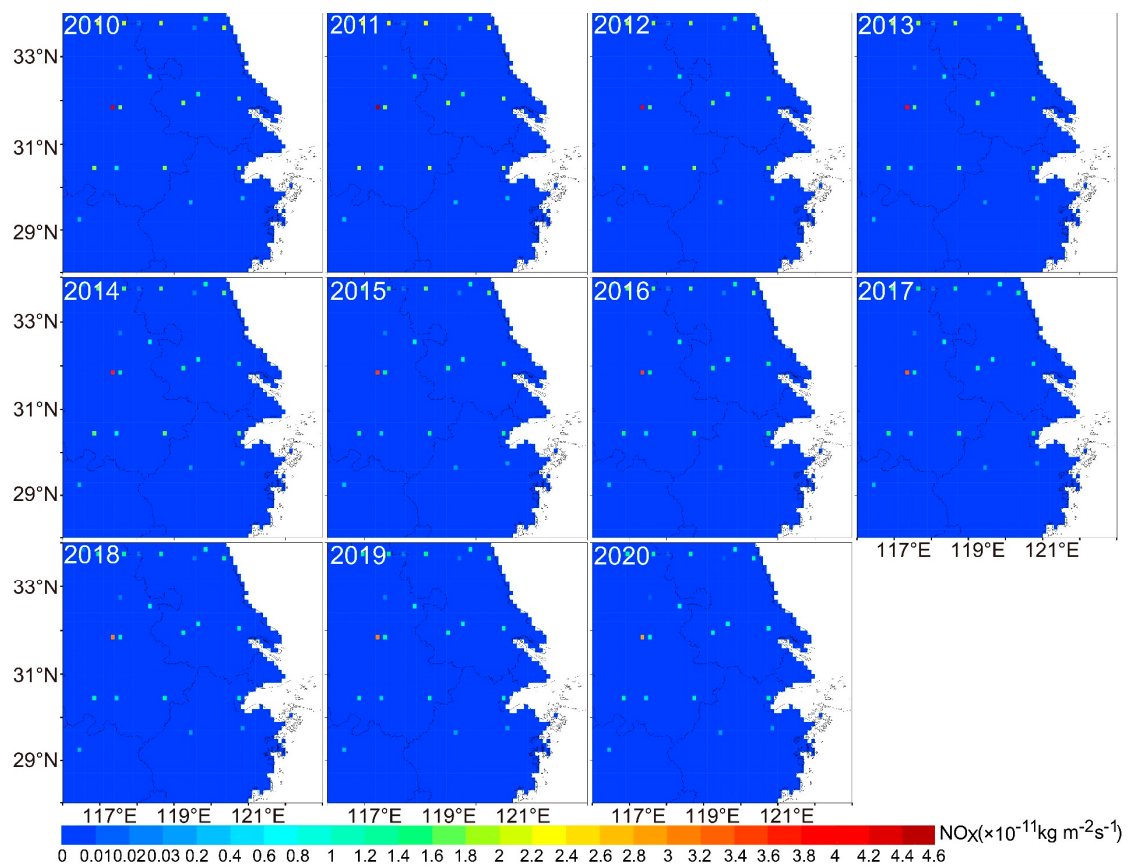

**Figure S17.** The spatial distribution of annual  $\text{NO}_x$  concentration in the YRD during 2010-2020.

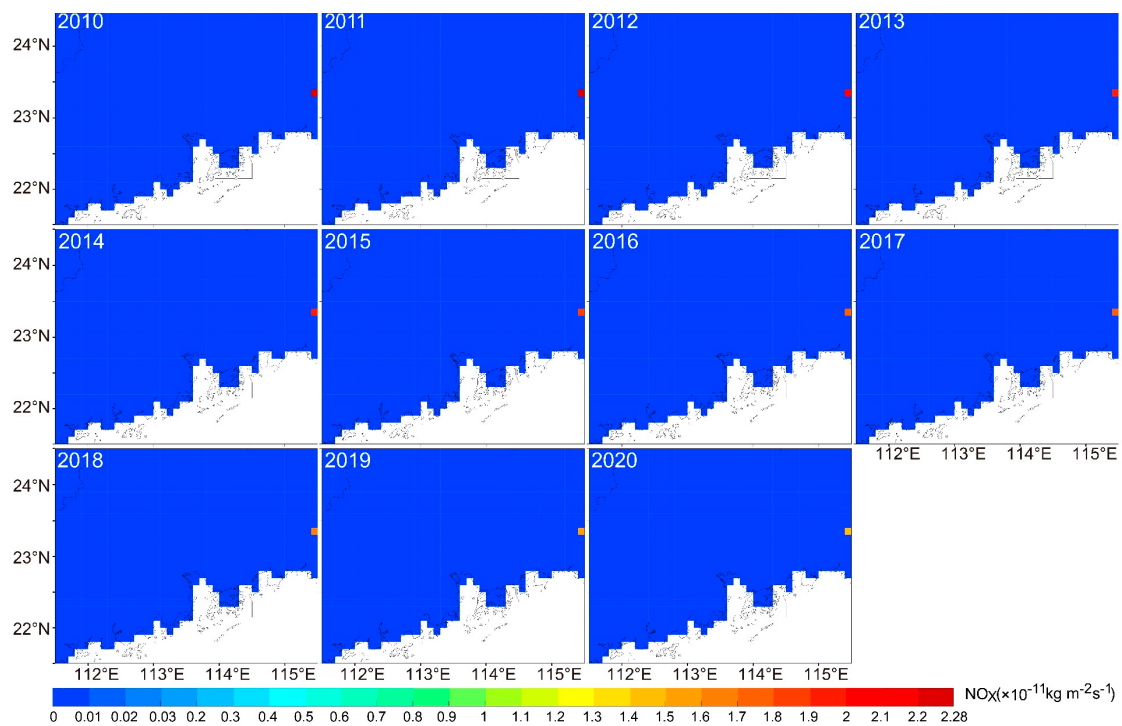

**Figure S18.** The spatial distribution of annual  $\text{NO}_x$  concentration in the PRD during 2010–2020.

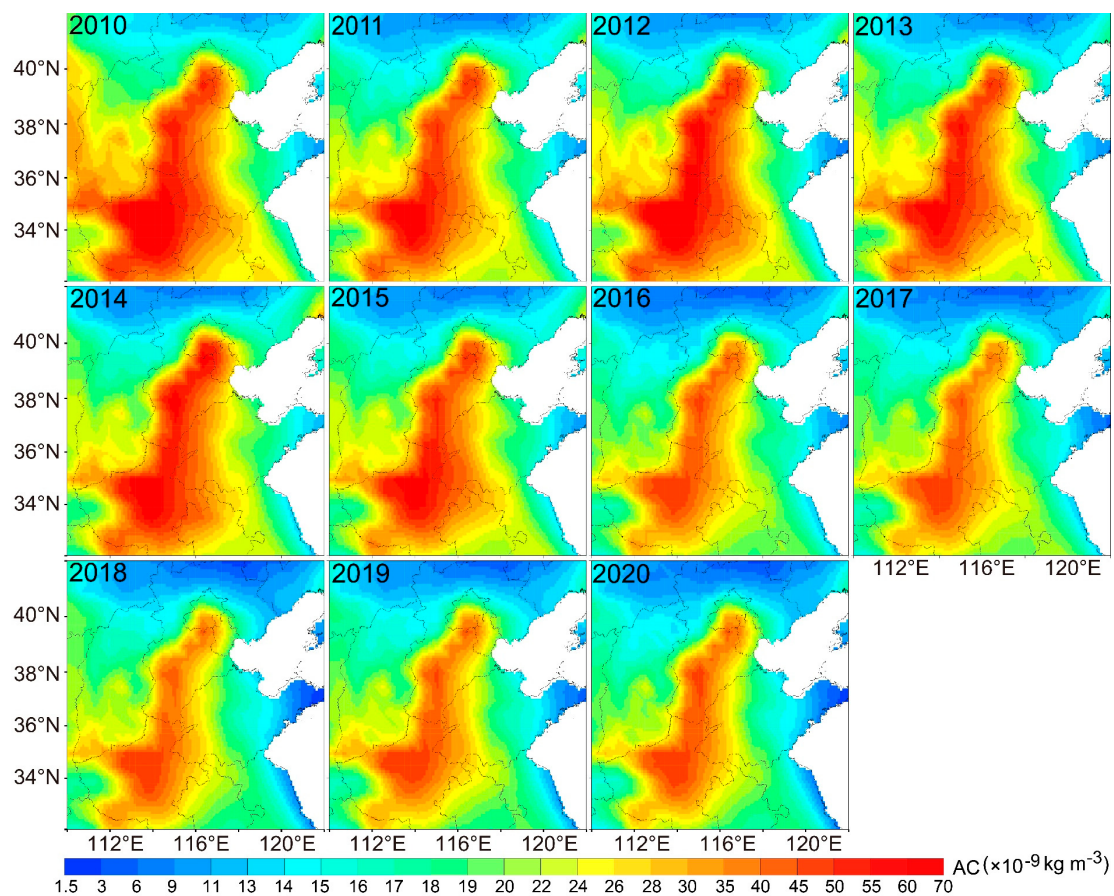

**Figure S19.** The spatial distribution of annual aerosol component concentration in the NCP during 2010-2020.

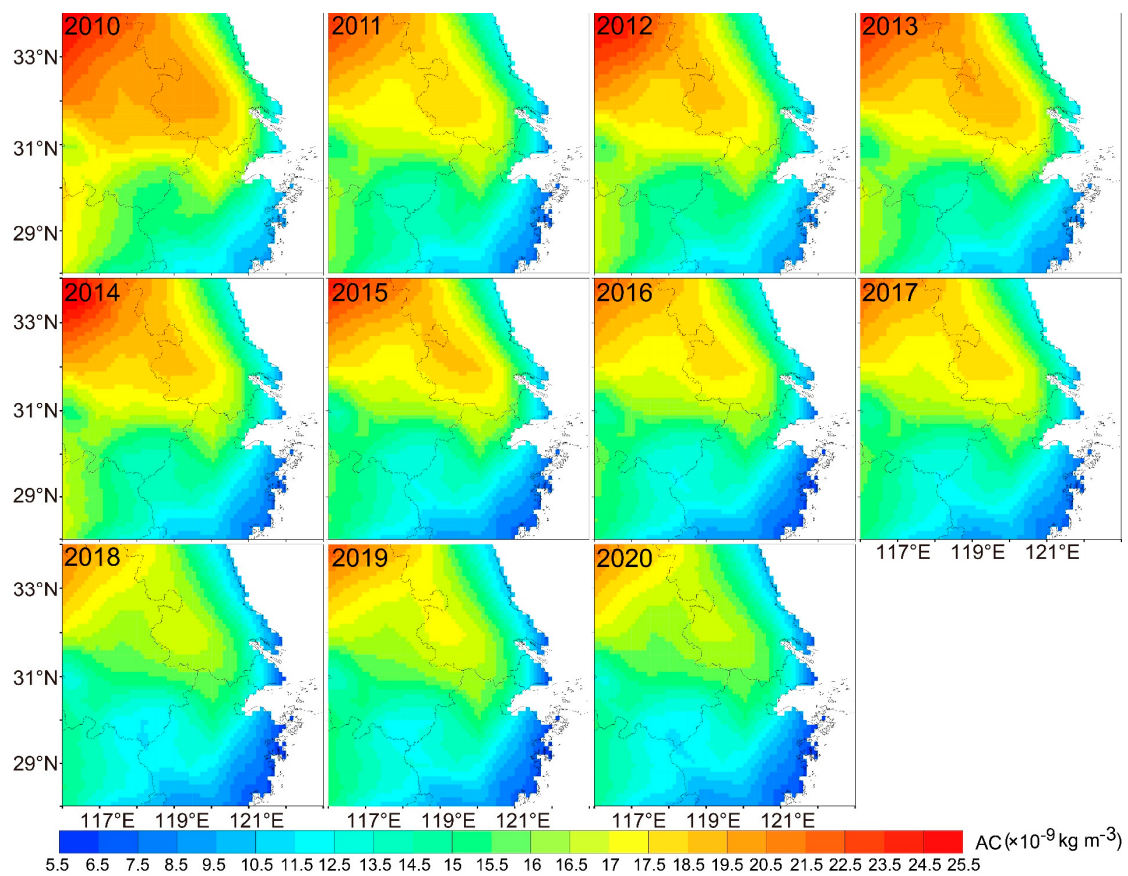

**Figure S20.** The spatial distribution of annual aerosol component concentration in the YRD during 2010-2020.

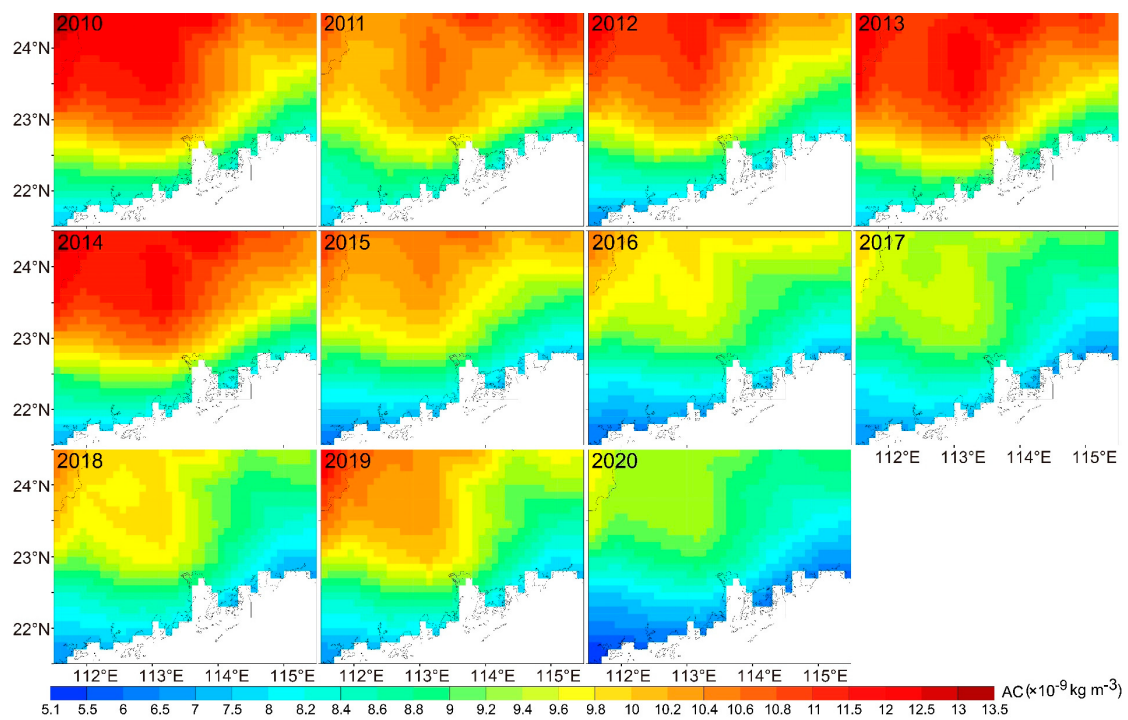

**Figure S21.** The spatial distribution of annual aerosol component concentration in the PRD during 2010-2020.
